# Supplementary figures and images for: Obesity accelerates Helicobacter felis-induced gastric carcinogenesis by enhancing immature myeloid cell trafficking and TH17 response.
Source: HighWire-hosted journal article supplement (doi:10.1136/gutjnl-2013-305092), 2014-03-01

Supplementary Figure 2

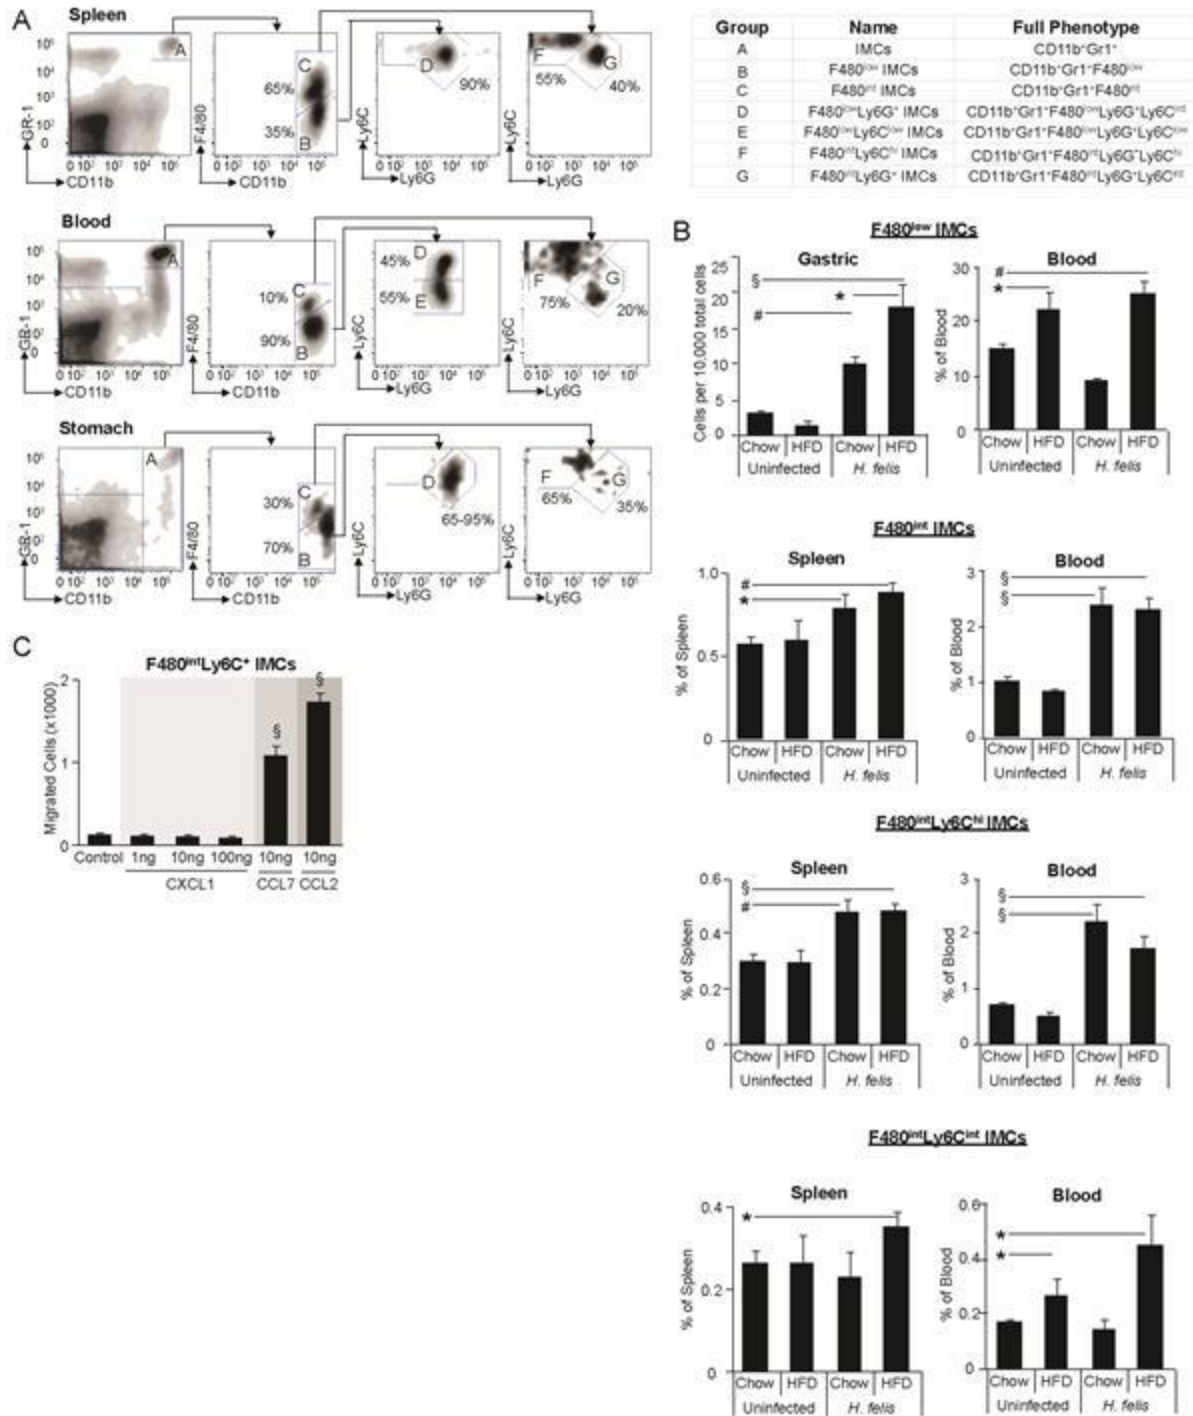

Supplement: gutjnl-2013-305092supp_figure2.pdf [file gutjnl-2013-305092supp_figure2.pdf]

Supplementary Figure 4

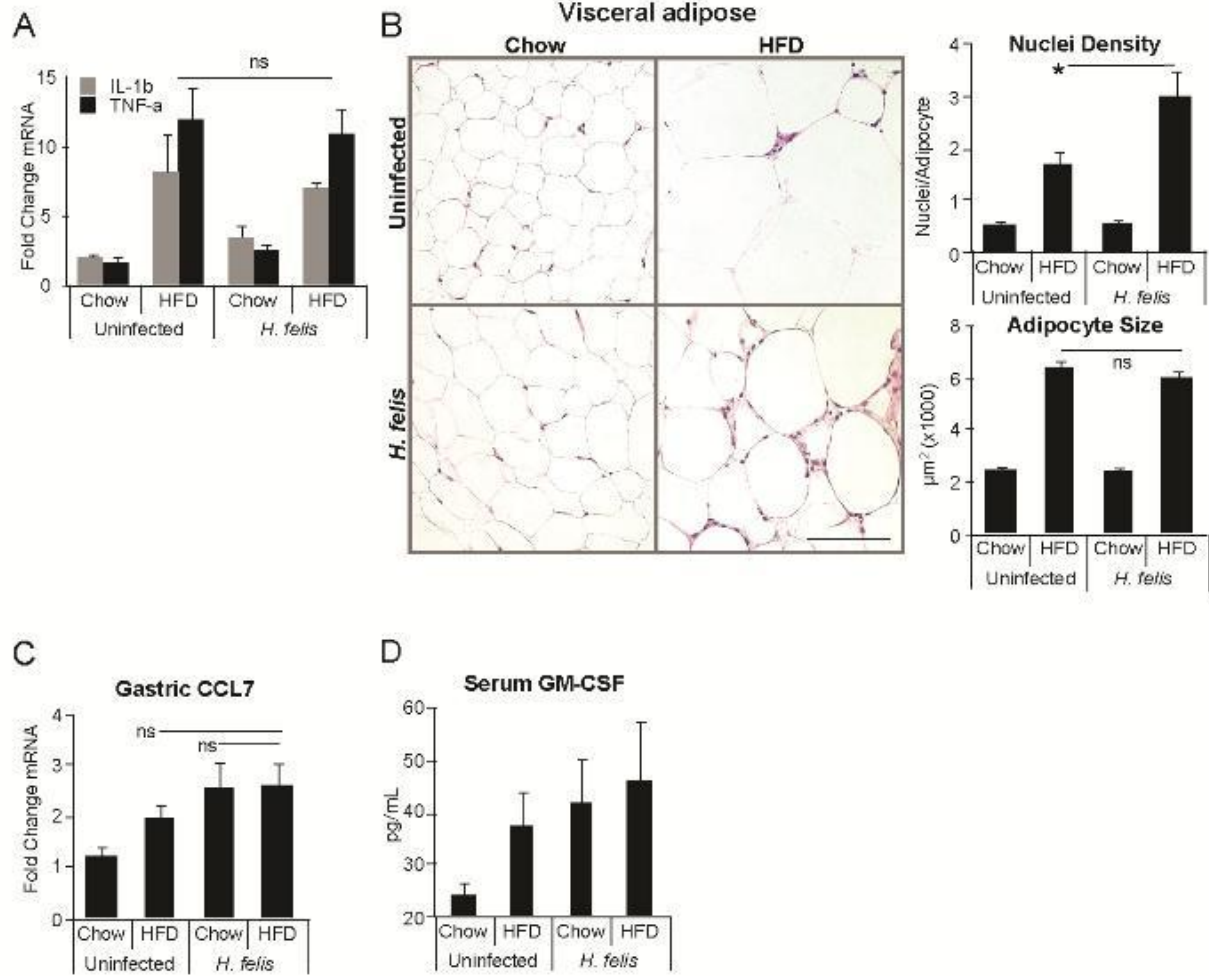

Supplement: gutjnl-2013-305092supp_figure4.pdf [file gutjnl-2013-305092supp_figure4.pdf]

Supplementary Figure 1

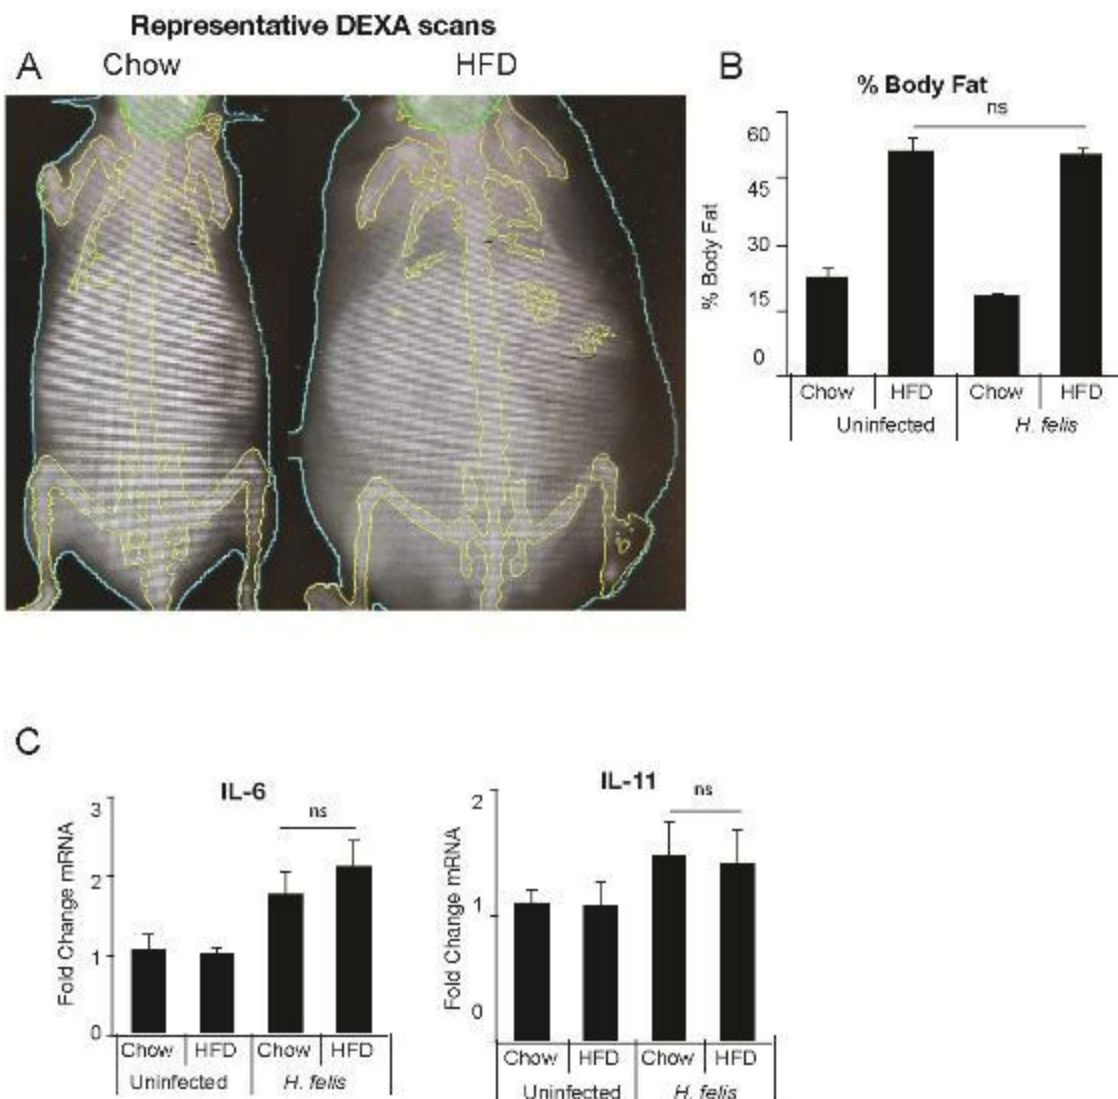

Supplement: gutjnl-2013-305092supp_figure1.pdf [file gutjnl-2013-305092supp_figure1.pdf]

Supplementary Figure 3

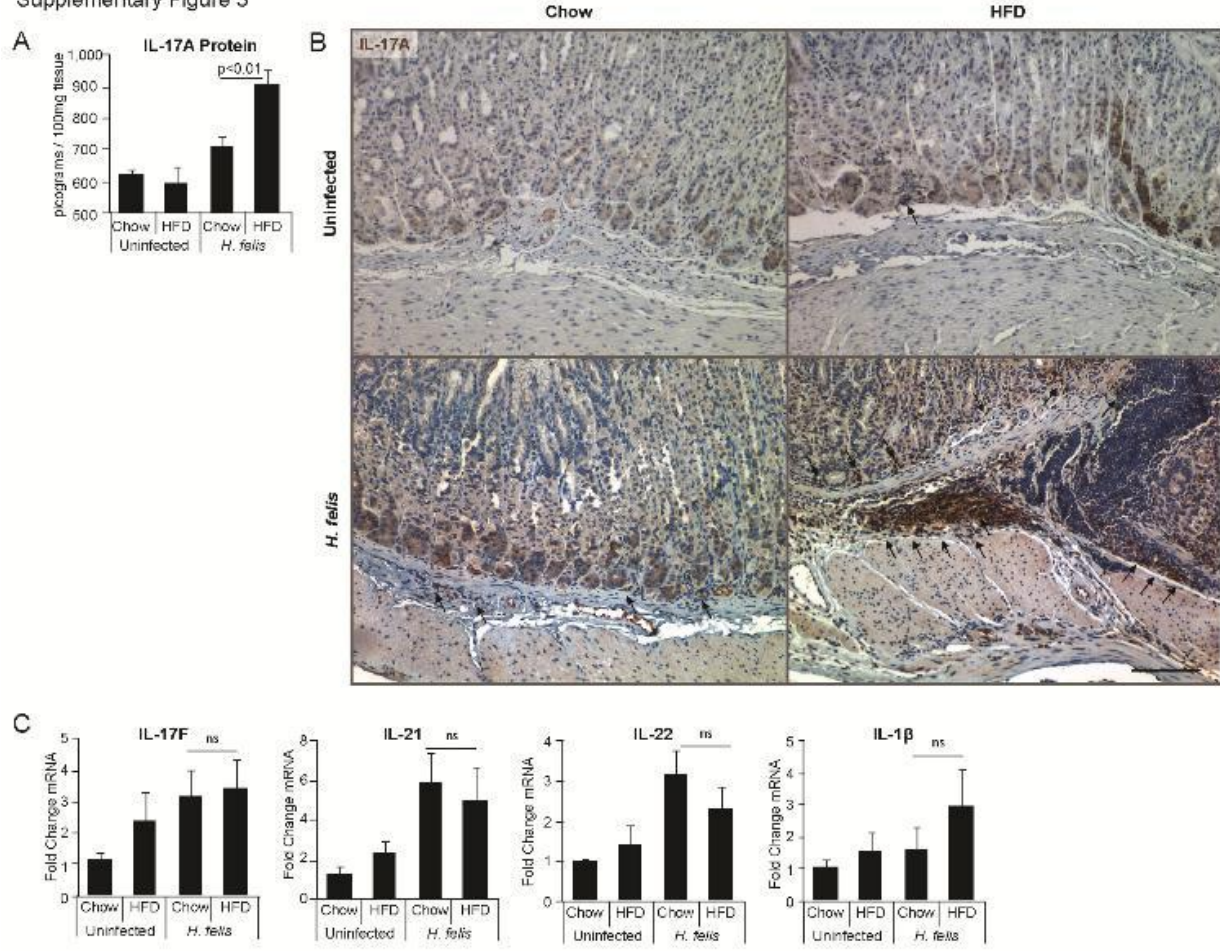

Supplement: gutjnl-2013-305092supp_figure3.pdf [file gutjnl-2013-305092supp_figure3.pdf]
